# Supplementary material for: Systematic analysis and expression profiles of TCP gene family in Tartary buckwheat (Fagopyrum tataricum (L.) Gaertn.) revealed the potential function of FtTCP15 and FtTCP18 in response to abiotic stress
Source: PubMed Central journal article supplement (PMC9164426; doi:10.1186/s12864-022-08618-1), 2022-06-02

## Figure legend

**Figure S1.** The correlation analysis of the gene expression of 12 selected FtTCPs under different abiotic stresses in this study. Data correlation was analyzed using the RStudio “corrplot” package.

**Figure S1.**

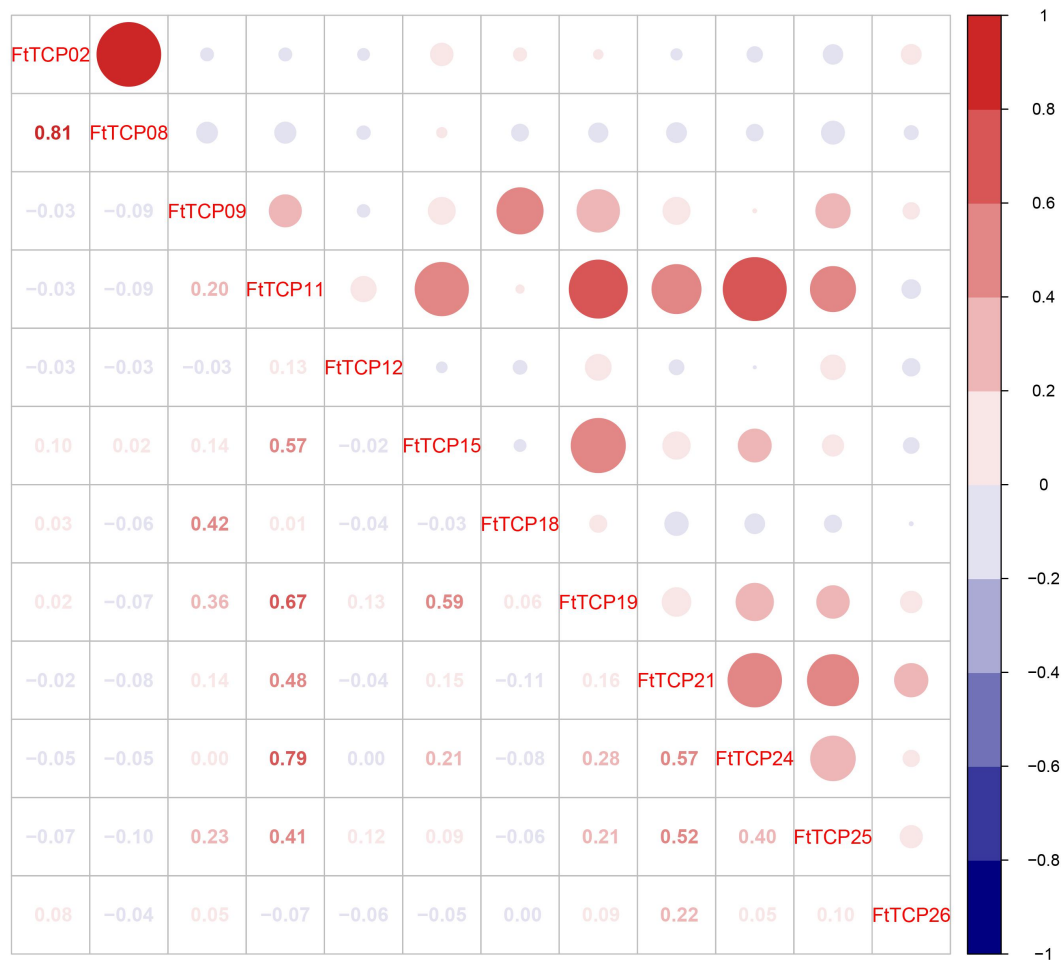

Supplement: 12864_2022_8618_MOESM5_ESM.pdf [file 12864_2022_8618_MOESM5_ESM.pdf]
